# Supplementary material
Source: PubMed Central journal article supplement (PMC3996996)
Supplement: Supp_Figure1.pdf [file Supp_Figure1.pdf]

## Supplementary Data

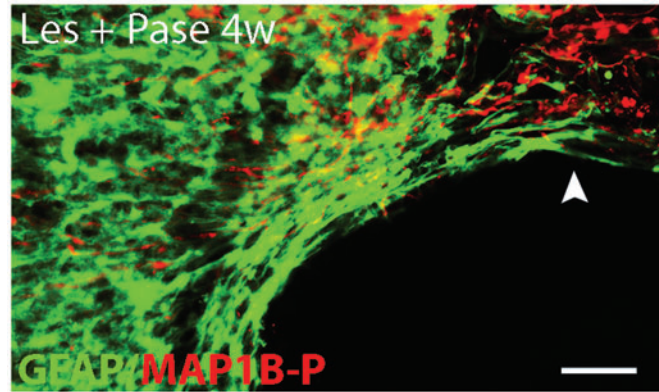

**SUPPLEMENTARY FIG. S1.** Double immunolabeling of glial fibrillary acidic protein (GFAP) positive astrocytes (green) and microtubule associated protein 1B (MAP1B)-P positive axons (red), 4 weeks post-injury of penicillinase (P-ase) treated animals. Astrocytes form a compact scar around the cavity. Bar: 65  $\mu$ m
