# Supplementary material
Source: PubMed Central journal article supplement (PMC3996996)
Supplement: Supp_Figure2.pdf [file Supp_Figure2.pdf]

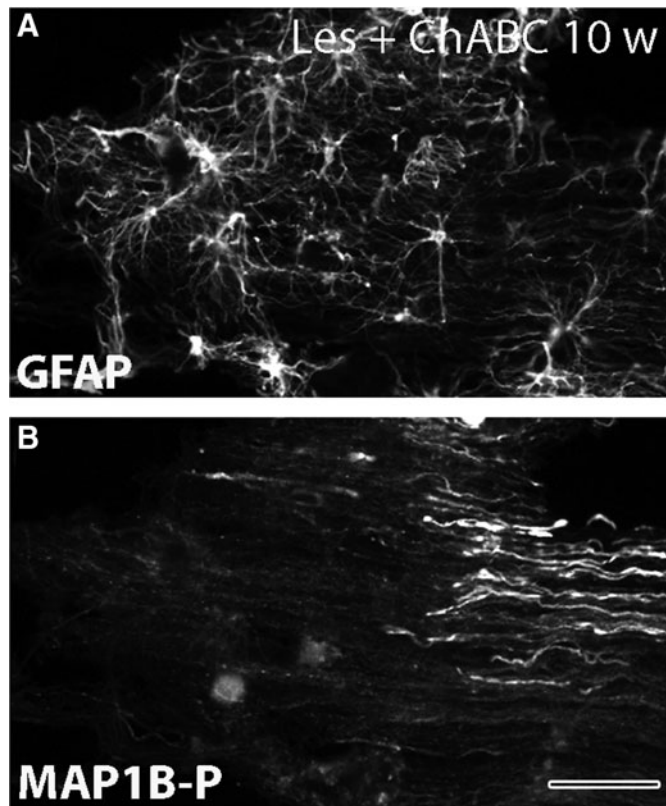

**SUPPLEMENTARY FIG. S2.** Double immunolabeling of glial fibrillary acidic protein (GFAP) positive astrocytes (**A**) and microtubule associated protein 1B (MAP1B)-P positive axons (**B**), 10 weeks post-injury of chondroitinase ABC (ChABC)-treated animals. Bar: 65  $\mu\text{m}$ .
