# Supplementary material
Source: PubMed Central journal article supplement (PMC3996996)
Supplement: Supp_Figure4.pdf [file Supp_Figure4.pdf]

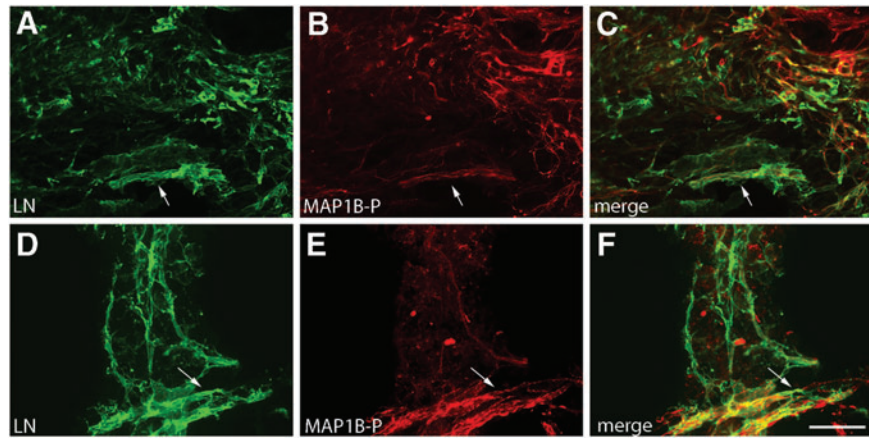

**SUPPLEMENTARY FIG. S4.** Double staining for laminin (LN) and microtubule associated protein 1B (MAP1B)-P, showing axons associated with blood vessels in chondroitinase ABC (ChABC)-treated animals, 2 weeks after spinal cord injury. Bar: 65  $\mu$ m.
