# Supplementary material
Source: PubMed Central journal article supplement (PMC3996996)
Supplement: Supp_Figure5.pdf [file Supp_Figure5.pdf]

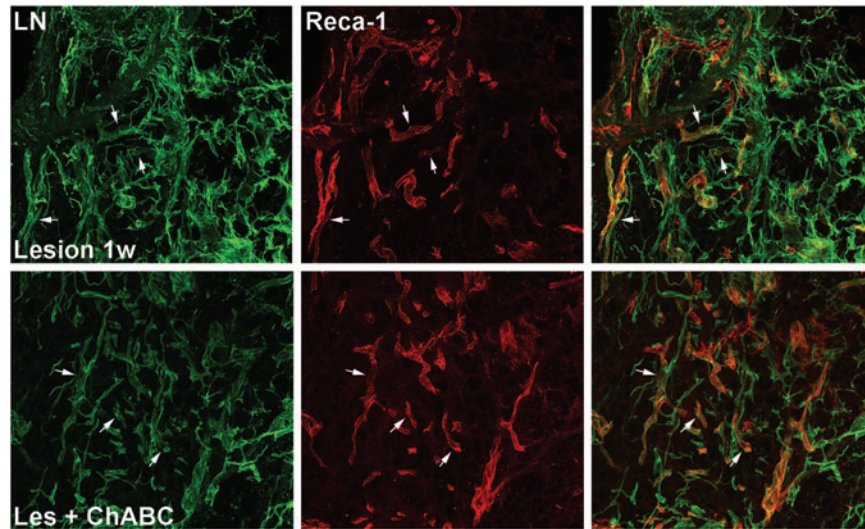

**SUPPLEMENTARY FIG. S5.** Double staining for laminin (LN) and rat endothelial cell antigen (RECA)-1 of blood vessels in untreated, and chondroitinase ABC (ChABC)-treated animals, 1 week after spinal cord injury. Bar: 80  $\mu$ m.
